# Supplementary material for: Decoration of boron nanoparticles on a graphene sheet for ammonia production from nitrate
Source: Royal Society of Chemistry journal article supplement (doi:10.1039/d3nr01089a), 2023-01-01
Supplement: d3nr01089a1.pdf [file d3nr01089a1.pdf]

## Decoration of Boron Nanoparticles on Graphene Sheet for Ammonia Production from Nitrate

Sagar Ingavale<sup>a</sup>, Phiralang Marbaniang<sup>b</sup>, Manoj Palabathuni,<sup>a</sup> Vaibhav Namdev Kale<sup>c</sup> and Nimai  
Mishra<sup>a,d</sup>

<sup>a</sup>*Department of Chemistry, SRM University-AP, Andhra Pradesh, Neerukonda, Guntur (Dt),  
Andhra Pradesh, India 522240.*

<sup>b</sup>*Department of Chemistry, Indian Institute of Technology Madras, Chennai, India 600036*

<sup>c</sup>*Department of Chemistry, SRM Institute of Science and Technology, Kattankulathur, India  
603203*

<sup>d</sup>*Institute of Chemical Technology Mumbai, IOC Odisha Campus Bhubaneswar, Bhubaneswar,  
Odisha, India 751013*

Figure S1

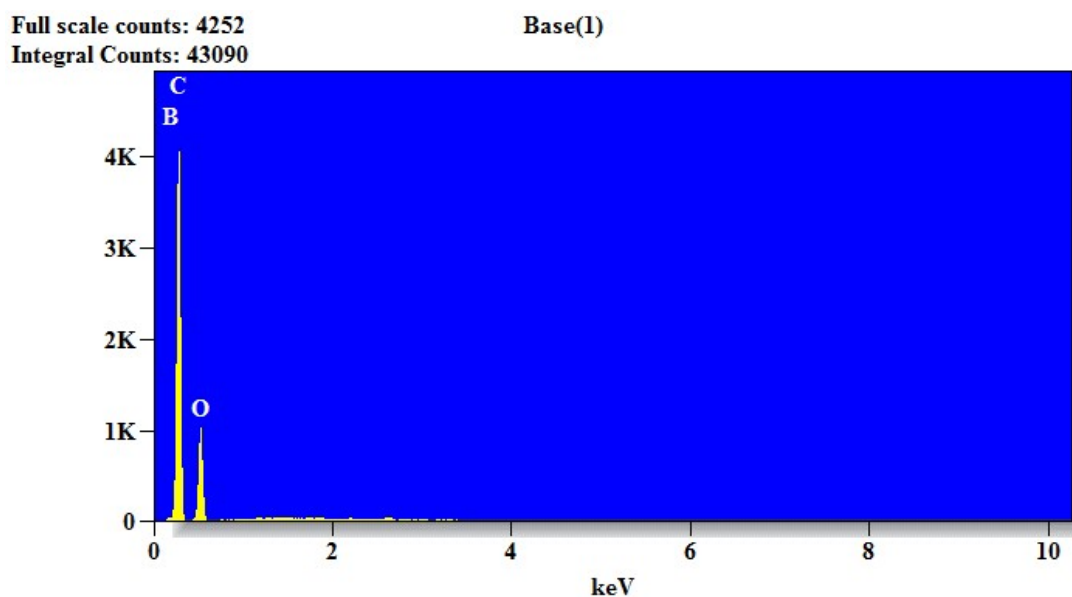

Figure S1: EDX of B@GO composite

Figure S2

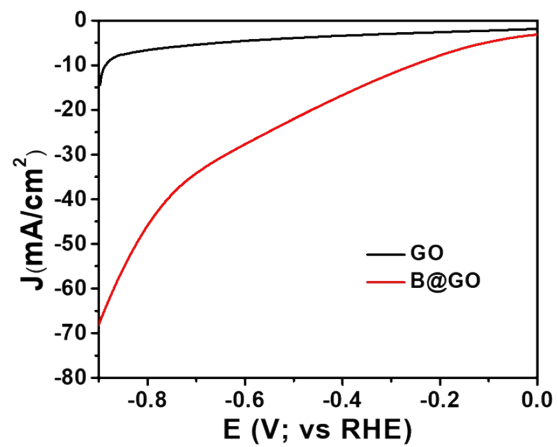

**Figure S2:** LSVs curve for GO and B@GO at 10 mV s<sup>-1</sup> in 0.1 M K<sub>2</sub>SO<sub>4</sub> and 0.5 M KNO<sub>3</sub> electrolyte.

Figure S3

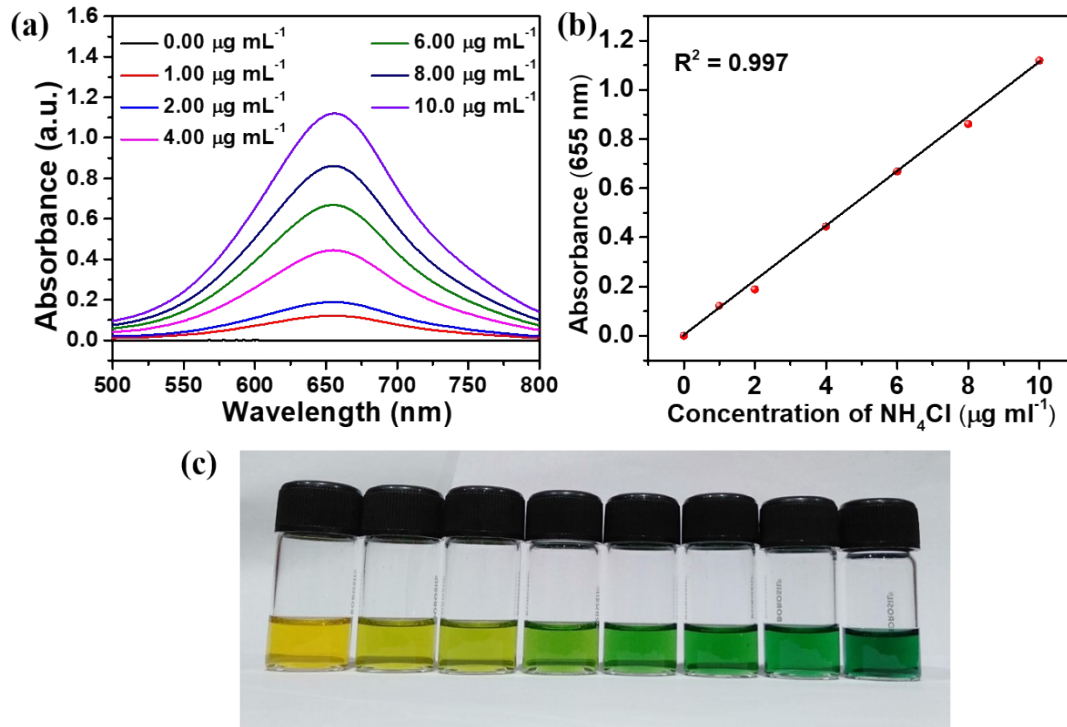

**Figure S3:** (a) UV-Vis spectra for indo-phenol determination of different known concentrations of  $\text{NH}_4^+$  standards. (b) Calibration curve obtained from linear fit. (c) photograph of standard  $\text{NH}_4^+$  solution.

Figure S4

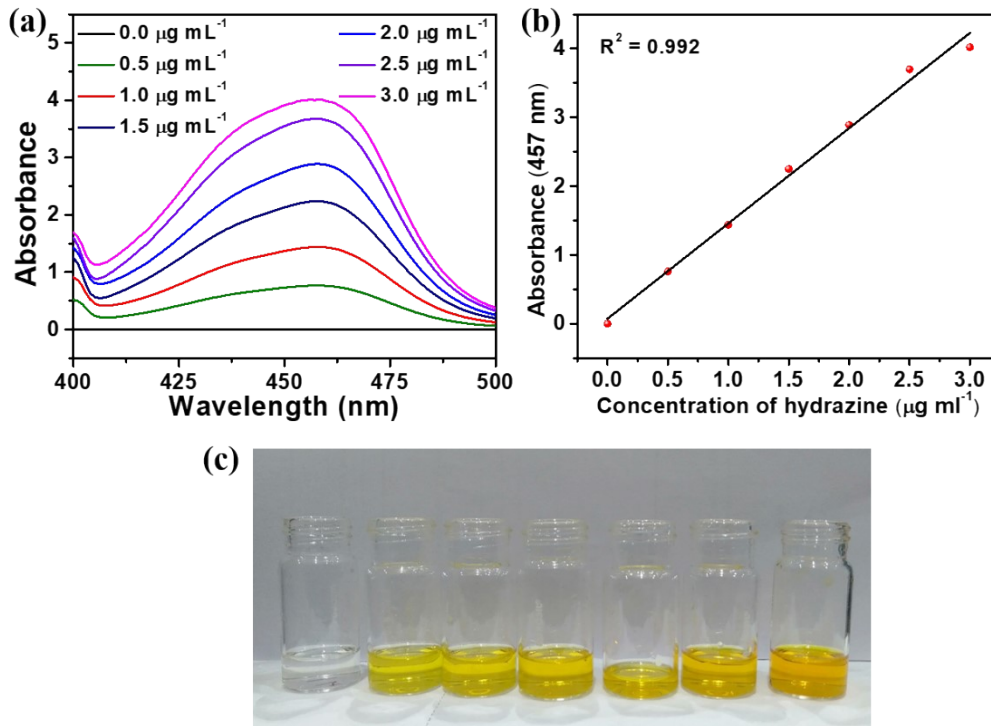

**Figure S4:** (a) UV-Vis spectra for Watt and Chrisp determination of different known concentrations of hydrazine standards. (b) Calibration curve obtained from linear fit. (c) Photograph of standard hydrazine solution.

Figure S5

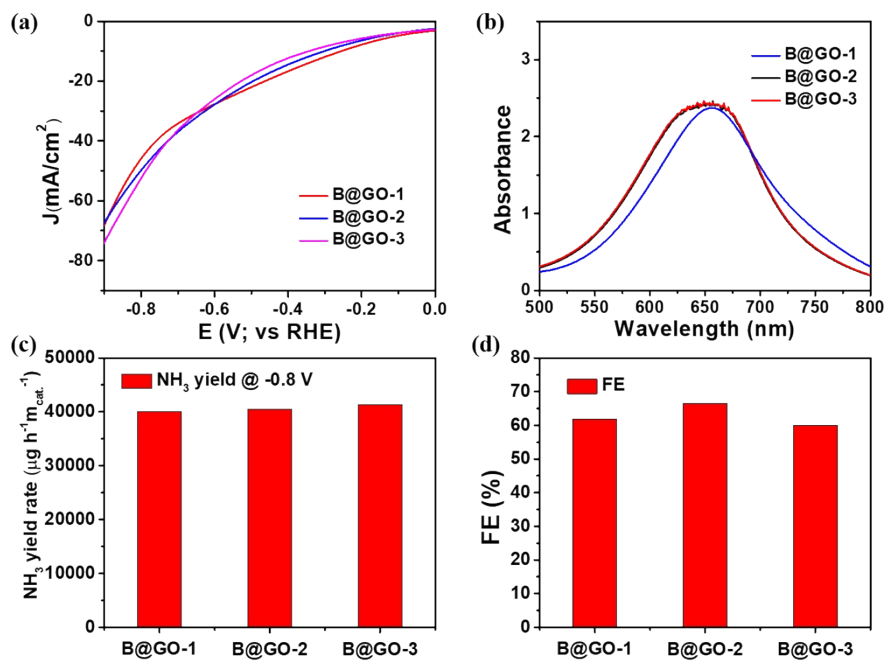

**Figure S5:** (a) Comparative LSVs curve of repeated experiments at  $10 \text{ mV s}^{-1}$  in  $0.1 \text{ M K}_2\text{SO}_4$  and  $0.5 \text{ M KNO}_3$  electrolyte. Comparison (b) absorbance spectra (c)  $\text{NH}_3$  yield and (d) Faradaic efficiency for  $\text{NH}_3$  production of B@GO-1, B@GO-2 and B@GO-3 catalysts at  $0.8 \text{ V}$  vs RHE.

Figure S6

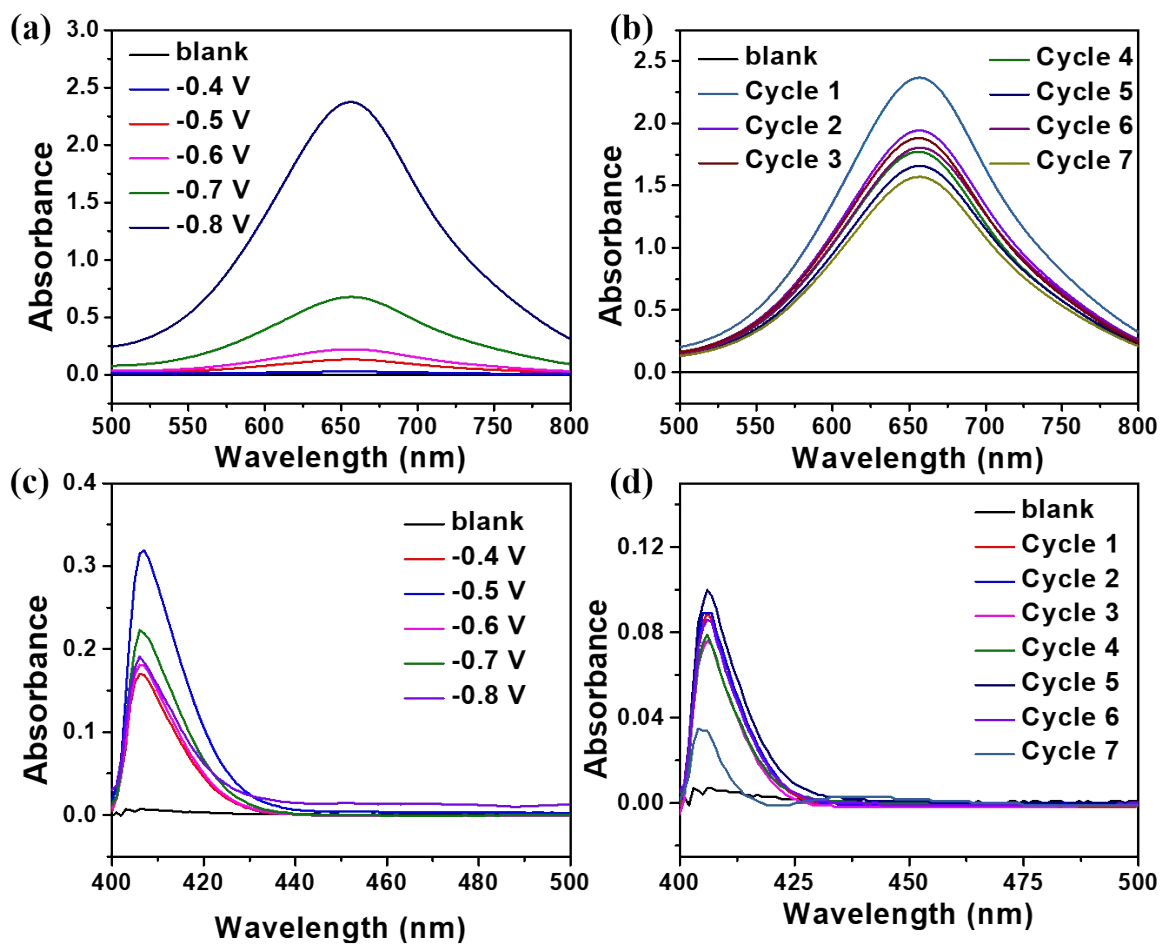

**Figure S6:** (a-b) UV-Vis spectra for indo-phenol determination of ammonia in electrolytes obtained from electrocatalytic *i-t* experiments at various applied potentials and at -0.8 V vs RHE respectively; (c-d) UV-Vis spectra for Watt and Chrisp determination of hydrazine in electrolytes obtained from electrocatalytic CA experiments at different applied potentials and -0.8 V vs RHE.
